# Supplementary material for: The utility of Google Trends data to examine interest in cancer screening
Source: HighWire-hosted journal article supplement (doi:10.1136/bmjopen-2014-006678), 2015-06-01
Supplement: bmjopen-2014-006678supp.pdf [file bmjopen-2014-006678supp.pdf]

Appendix 1: Google Trends search terms used for each screening test and associated interests and Behavioral Risk Factor Surveillance Survey question.

| Concept                                   | Google Trends Search terms used                                                                                                                                                                                                                              | Behavioral Risk Factor Surveillance Survey question (BRFSS)                                                                                                                                                                                                                                                                                                                                                                                                                                                                                                                                                                                                |
|-------------------------------------------|--------------------------------------------------------------------------------------------------------------------------------------------------------------------------------------------------------------------------------------------------------------|------------------------------------------------------------------------------------------------------------------------------------------------------------------------------------------------------------------------------------------------------------------------------------------------------------------------------------------------------------------------------------------------------------------------------------------------------------------------------------------------------------------------------------------------------------------------------------------------------------------------------------------------------------|
| <b>Screening for colorectal cancer</b>    |                                                                                                                                                                                                                                                              |                                                                                                                                                                                                                                                                                                                                                                                                                                                                                                                                                                                                                                                            |
| Colonoscopy                               | Colonoscopy+ colonoscopy procedure +virtual colonoscopy+endoscopy +miralax prep+colonoscopy procedure+endoscopy procedure+what is colonoscopy+prep for colonoscopy+miralax+bowel prep+colonoscopy prep+colon cancer screening+colon cancer test              | <p>1. Sigmoidoscopy and colonoscopy are exams in which a tube is inserted in the rectum to view the colon for signs of cancer or other health problems. Have you ever had either of these exams?</p> <p>2. For a SIGMOIDOSCOPY, a flexible tube is inserted into the rectum to look for problems. A COLONOSCOPY is similar, but uses a longer tube, and you are usually given medication through a needle in your arm to make you sleepy and told to have someone else drive you home after the test. Was your MOST RECENT exam a sigmoidoscopy or a colonoscopy?</p> <p>3. How long has it been since you had your last sigmoidoscopy or colonoscopy?</p> |
| Virtual colonoscopy                       | virtual colonoscopy+ct colonography+virtual colonoscopy cost+ct colonoscopy                                                                                                                                                                                  | Not asked in BRFSS                                                                                                                                                                                                                                                                                                                                                                                                                                                                                                                                                                                                                                         |
| Miralax to cleanse colon for colonoscopy  | miralax colonoscopy+colonoscopy prep miralax+miralax dosage colonoscopy+ colonoscopy miralax prep+miralax for colonoscopy+miralax and colonoscopy+miralax gatorade colonoscopy+colonoscopy preparation miralax+miralax before colonoscopy+miralax bowel prep | Not asked in BRFSS                                                                                                                                                                                                                                                                                                                                                                                                                                                                                                                                                                                                                                         |
| Prepopik to cleanse colon for colonoscopy | prepopik+prepopik dosage+prepopik prep+side effects prepopik+prepopik colonoscopy+colonoscopy prep prepopik                                                                                                                                                  | Not asked in BRFSS                                                                                                                                                                                                                                                                                                                                                                                                                                                                                                                                                                                                                                         |

|                                         |                                                                                                                                                                                                                                                                  |                                                                                                                                                                                                                                                       |
|-----------------------------------------|------------------------------------------------------------------------------------------------------------------------------------------------------------------------------------------------------------------------------------------------------------------|-------------------------------------------------------------------------------------------------------------------------------------------------------------------------------------------------------------------------------------------------------|
| Suprep to cleanse colon for colonoscopy | suprep+colonoscopy+colonoscopy prep<br>suprep+suprep dosage colonoscopy+<br>colonoscopy suprep+suprep for<br>colonoscopy+suprep and colonoscopy+suprep<br>gatorade colonoscopy+colonoscopy<br>preparation suprep +suprep before<br>colonoscopy+suprep bowel prep | Not asked in BRFSS                                                                                                                                                                                                                                    |
| Free/low-cost colonoscopy               | free colonoscopy+low cost colonoscopy+free<br>colonoscopy screening                                                                                                                                                                                              | Not asked in BRFSS                                                                                                                                                                                                                                    |
| Cost for colonoscopy                    | cost of colonoscopy+colonoscopy<br>cost+average colonoscopy cost+endoscopy<br>cost                                                                                                                                                                               | Not asked in BRFSS                                                                                                                                                                                                                                    |
| Fecal Occult Blood Test (FOBT)          | fobt+blood test for colon cancer+colon cancer<br>blood test+screening for colon cancer with<br>blood test+fobt test+fecal occult blood<br>test+blood stool test for cancer                                                                                       | 1. A blood stool test is a test that may use a special kit at home to determine whether the stool contains blood. Have you ever had this test using a home kit?<br>2. How long has it been since you had your last blood stool test using a home kit? |
| <b>Screening for breast cancer</b>      |                                                                                                                                                                                                                                                                  |                                                                                                                                                                                                                                                       |
| Mammography                             | mammography+breast mammography+breast<br>cancer<br>screening+mammography+mammograms+scr<br>eening mammography+breast<br>mammogram+breast cancer<br>mammogram+mammo+mammogram<br>screening+mammogram+mammogram<br>results+free mammogram+digital<br>mammography   | 1. A mammogram is an x-ray of each breast to look for breast cancer. Have you ever had a mammogram?<br>2. How long has it been since you had your last mammogram?                                                                                     |
| Digital mammography                     | digital<br>mammography+mammogram+mammography<br>+digital mammograms+digital mammography<br>screening                                                                                                                                                             | Not asked in BRFSS                                                                                                                                                                                                                                    |

|                                      |                                                                                                                                                                                    |                                                                                                                                                                                                                                                                                                                                            |
|--------------------------------------|------------------------------------------------------------------------------------------------------------------------------------------------------------------------------------|--------------------------------------------------------------------------------------------------------------------------------------------------------------------------------------------------------------------------------------------------------------------------------------------------------------------------------------------|
|                                      |                                                                                                                                                                                    |                                                                                                                                                                                                                                                                                                                                            |
| 3D mammography                       | 3D mammography+3D mammogram                                                                                                                                                        | Not asked in BRFSS                                                                                                                                                                                                                                                                                                                         |
| Free/low-cost mammography            | free mammogram+free mammography+low cost mammogram+low cost mammography+free mammogram screening+free mammograms                                                                   | Not asked in BRFSS                                                                                                                                                                                                                                                                                                                         |
| <b>Screening for cervical cancer</b> |                                                                                                                                                                                    |                                                                                                                                                                                                                                                                                                                                            |
| Pap smear                            | pap test+cervical cancer screening+pap smear test+the pap test+pap smears+free pap smear+free pap+pap tests+pap smear+cervical cancer test+cervical smear+pap testing+papanicolaou | <ol style="list-style-type: none"> <li>1. A Pap test is a test for cancer of the cervix. Have you ever had a Pap test?</li> <li>2. How long has it been since you had your last Pap test?</li> </ol>                                                                                                                                       |
| Breast self exam                     | Breast self exam                                                                                                                                                                   | Not asked in BRFSS                                                                                                                                                                                                                                                                                                                         |
| <b>Screening for prostate cancer</b> |                                                                                                                                                                                    |                                                                                                                                                                                                                                                                                                                                            |
| PSA test                             | psa test+prostate cancer test+psa testing+prostate test+psa test cancer+prostate+cancer tests+prostate specific antigen test+ prostate psa+ prostate cancer screening tests        | <ol style="list-style-type: none"> <li>1. A Prostate-Specific Antigen test, also called a PSA test, is a blood test used to check men for prostate cancer. Has a doctor EVER recommended that you have a PSA test?</li> <li>2. Have you EVER HAD a PSA test?</li> <li>3. How long has it been since you had your last PSA test?</li> </ol> |
| <b>Screening for lung cancer</b>     |                                                                                                                                                                                    |                                                                                                                                                                                                                                                                                                                                            |
| Lung cancer screening                | lung cancer screening+screening for lung cancer+lung cancer screening CT+CT lung cancer screening                                                                                  | Not asked in BRFSS                                                                                                                                                                                                                                                                                                                         |
